# Supplementary material for: Development and validation of the TOCO–TURBT tool: a summative assessment tool that measures surgical competency in transurethral resection of bladder tumour
Source: Springer Nature journal article supplement (doi:10.1007/s00464-018-6251-8), 2018-06-05
Supplement: MOESM6 [file 15821274]

**Appendix 4a.** Equation for the estimation of residents’ experience in TURBT

*Nassist* = no. of TURBT procedures performed as an *assistant*

*Nsup1* = no. of TURBT procedures performed s a *surgeon under close supervision*

*Nsup2* = no. of TURBT procedures performed as a *surgeon under limited supervision*

*Nind* = no. of TURBT procedures performed *independently*

**Appendix 4b**. Equation for the estimation of urologists’ experience in TURBT

*Npart:* no. of TURBT procedures *partially* performed

*Ncompl:* no. of TURBT procedures *completely* performed
